# Supplementary material for: Optimal intrusion detection for imbalanced data using Bagging method with deep neural network optimized by flower pollination algorithm
Source: PeerJ journal article supplement (doi:10.7717/peerj-cs.2745), 2025-03-17
Supplement: Data.zip [file BoT-IoTresults.xlsx]

## Sheet: Proposed
TN	FP	FN	TP	Normal	Attack	accuracy	precision	recall	f-score
425	52	18421	3649624	477	3668045	99.4964	99.9986	99.4978	99.7476
421	56	19856	3648189	477	3668045	99.4572	99.9985	99.4587	99.7278
432	45	21933	3646112	477	3668045	99.4009	99.9988	99.4021	99.6995
416	61	20634	3647411	477	3668045	99.4359	99.9983	99.4375	99.7171
436	41	18732	3649313	477	3668045	99.4883	99.9989	99.4893	99.7434
421	56	21973	3646072	477	3668045	99.3995	99.9985	99.401	99.6988
432	45	23776	3644269	477	3668045	99.3507	99.9988	99.3518	99.6742
429	48	19964	3648081	477	3668045	99.4545	99.9987	99.4557	99.7265
425	52	23341	3644704	477	3668045	99.3623	99.9986	99.3637	99.6801
440	37	21687	3646358	477	3668045	99.4078	99.999	99.4088	99.703
430	47	19201	3648844	477	3668045	99.4753	99.9987	99.4765	99.7369
432	45	22112	3645933	477	3668045	99.396	99.9988	99.3972	99.6971
421	56	21303	3646742	477	3668045	99.4178	99.9985	99.4192	99.708
432	45	24347	3643698	477	3668045	99.3351	99.9988	99.3362	99.6664
434	43	20948	3647097	477	3668045	99.4278	99.9988	99.4289	99.713
432	45	23939	3644106	477	3668045	99.3462	99.9988	99.3474	99.672
426	51	21673	3646372	477	3668045	99.4078	99.9986	99.4091	99.703
443	34	23211	3644834	477	3668045	99.3664	99.9991	99.3672	99.6821
425	52	18358	3649687	477	3668045	99.4982	99.9986	99.4995	99.7484
436	41	24782	3643263	477	3668045	99.3234	99.9989	99.3244	99.6605
432	45	23451	3644594	477	3668045	99.3595	99.9988	99.3607	99.6787
439	38	19296	3648749	477	3668045	99.473	99.999	99.4739	99.7358
427	50	18207	3649838	477	3668045	99.5023	99.9986	99.5036	99.7505
438	39	21901	3646144	477	3668045	99.4019	99.9989	99.4029	99.7
432	45	23211	3644834	477	3668045	99.3661	99.9988	99.3672	99.682
426	51	19856	3648189	477	3668045	99.4574	99.9986	99.4587	99.7279
432	45	22450	3645595	477	3668045	99.3868	99.9988	99.388	99.6924
424	53	21859	3646186	477	3668045	99.4027	99.9985	99.4041	99.7004
431	46	19304	3648741	477	3668045	99.4725	99.9987	99.4737	99.7355
432	45	24347	3643698	477	3668045	99.3351	99.9988	99.3362	99.6664
						99.4135	99.9987	99.4147	99.7058
