# Supplementary material for: Optimal intrusion detection for imbalanced data using Bagging method with deep neural network optimized by flower pollination algorithm
Source: PeerJ journal article supplement (doi:10.7717/peerj-cs.2745), 2025-03-17
Supplement: Data.zip [file CIC-IDS2017results.xlsx]

## Sheet: Proposed
TN	FP	FN	TP	Normal	Attack	accuracy	precision	recall	f-score
125956	2071	184	97534	128027	97718	99.0011	97.9208	99.8117	98.8572
126323	1704	129	97589	128027	97718	99.188	98.2839	99.868	99.0696
126684	1343	97	97621	128027	97718	99.3621	98.6429	99.9007	99.2679
126021	2006	161	97557	128027	97718	99.0401	97.9852	99.8352	98.9016
126857	1170	65	97653	128027	97718	99.4529	98.8161	99.9335	99.3716
126393	1634	118	97600	128027	97718	99.2239	98.3534	99.8792	99.1104
126671	1356	101	97617	128027	97718	99.3546	98.6299	99.8966	99.2592
126777	1250	73	97645	128027	97718	99.4139	98.736	99.9253	99.3271
126839	1188	65	97653	128027	97718	99.4449	98.7981	99.9335	99.3625
126716	1311	84	97634	128027	97718	99.382	98.675	99.914	99.2907
126330	1697	121	97597	128027	97718	99.1947	98.2909	99.8762	99.0772
126655	1372	98	97620	128027	97718	99.3488	98.614	99.8997	99.2527
126324	1703	134	97584	128027	97718	99.1862	98.2848	99.8629	99.0675
126784	1243	77	97641	128027	97718	99.4153	98.743	99.9212	99.3286
126891	1136	61	97657	128027	97718	99.4698	98.8501	99.9376	99.3909
126086	1941	140	97578	128027	97718	99.0782	98.0496	99.8567	98.9449
126592	1435	105	97613	128027	97718	99.3178	98.5512	99.8925	99.2173
126251	1776	134	97584	128027	97718	99.1539	98.2126	99.8629	99.0308
126782	1245	74	97644	128027	97718	99.4157	98.741	99.9243	99.3291
126723	1304	89	97629	128027	97718	99.3829	98.6819	99.9089	99.2916
126896	1131	64	97654	128027	97718	99.4706	98.8551	99.9345	99.3919
126604	1423	98	97620	128027	97718	99.3262	98.5633	99.8997	99.227
126922	1105	58	97660	128027	97718	99.4848	98.8812	99.9406	99.4081
126269	1758	134	97584	128027	97718	99.1619	98.2304	99.8629	99.0399
126839	1188	64	97654	128027	97718	99.4454	98.7981	99.9345	99.363
126896	1131	59	97659	128027	97718	99.4729	98.8551	99.9396	99.3944
126752	1275	68	97650	128027	97718	99.4051	98.7111	99.9304	99.317
126892	1135	64	97654	128027	97718	99.4689	98.8511	99.9345	99.3898
126684	1343	89	97629	128027	97718	99.3657	98.6431	99.9089	99.272
126299	1728	134	97584	128027	97718	99.1752	98.26	99.8629	99.055
						99.3201	98.5503	99.8996	99.2202
