# Supplementary material for: Optimal intrusion detection for imbalanced data using Bagging method with deep neural network optimized by flower pollination algorithm
Source: PeerJ journal article supplement (doi:10.7717/peerj-cs.2745), 2025-03-17
Supplement: Data.zip [file NSL-KDDresults.xlsx]

## Sheet: Proposed
TN	FP	FN	TP	Normal	Attack	accuracy	precision	recall	f-score
76565	489	69	71394	77054	71463	99.6243	99.3197	99.9034	99.6107
76552	502	78	71385	77054	71463	99.6095	99.3017	99.8909	99.5954
76540	514	96	71367	77054	71463	99.5893	99.2849	99.8657	99.5745
76570	484	59	71404	77054	71463	99.6344	99.3267	99.9174	99.6212
76478	576	101	71362	77054	71463	99.5442	99.1993	99.8587	99.5279
76543	511	58	71405	77054	71463	99.6169	99.2894	99.9188	99.6031
76555	499	69	71394	77054	71463	99.6176	99.3059	99.9034	99.6038
76540	514	66	71397	77054	71463	99.6095	99.2852	99.9076	99.5955
76552	502	78	71385	77054	71463	99.6095	99.3017	99.8909	99.5954
76565	489	69	71394	77054	71463	99.6243	99.3197	99.9034	99.6107
76478	576	101	71362	77054	71463	99.5442	99.1993	99.8587	99.5279
76525	529	69	71394	77054	71463	99.5974	99.2645	99.9034	99.5829
76544	510	63	71400	77054	71463	99.6142	99.2908	99.9118	99.6003
76478	576	61	71402	77054	71463	99.5711	99.1998	99.9146	99.5559
76478	576	91	71372	77054	71463	99.5509	99.1994	99.8727	99.5349
76545	509	69	71394	77054	71463	99.6108	99.2921	99.9034	99.5968
76478	576	96	71367	77054	71463	99.5475	99.1994	99.8657	99.5314
76556	498	60	71403	77054	71463	99.6243	99.3074	99.916	99.6108
76540	514	96	71367	77054	71463	99.5893	99.2849	99.8657	99.5745
76478	576	78	71385	77054	71463	99.5596	99.1996	99.8909	99.544
76560	494	69	71394	77054	71463	99.6209	99.3128	99.9034	99.6073
76478	576	70	71393	77054	71463	99.565	99.1997	99.902	99.5496
76478	576	73	71390	77054	71463	99.563	99.1996	99.8978	99.5475
76549	505	63	71400	77054	71463	99.6176	99.2977	99.9118	99.6038
76561	493	69	71394	77054	71463	99.6216	99.3142	99.9034	99.608
76478	576	61	71402	77054	71463	99.5711	99.1998	99.9146	99.5559
76557	497	59	71404	77054	71463	99.6256	99.3088	99.9174	99.6122
76552	502	78	71385	77054	71463	99.6095	99.3017	99.8909	99.5954
76478	576	91	71372	77054	71463	99.5509	99.1994	99.8727	99.5349
76565	489	69	71394	77054	71463	99.6243	99.3197	99.9034	99.6107
						99.5953	99.2675	99.896	99.5808
