# Supplementary material for: Optimal intrusion detection for imbalanced data using Bagging method with deep neural network optimized by flower pollination algorithm
Source: PeerJ journal article supplement (doi:10.7717/peerj-cs.2745), 2025-03-17
Supplement: Data.zip [file UNSW-NB15results.xlsx]

## Sheet: Proposed
TN	FP	FN	TP	Normal	Attack	accuracy	precision	recall	f-score
89727	3273	1722	162951	93000	164673	98.0615	98.031	98.9543	98.4905
89841	3159	1754	162919	93000	164673	98.0933	98.0979	98.9349	98.5146
89810	3190	1656	163017	93000	164673	98.1193	98.0807	98.9944	98.5354
89922	3078	1584	163089	93000	164673	98.1907	98.1476	99.0381	98.5909
91085	1915	1780	162893	93000	164673	98.566	98.838	98.9191	98.8785
89841	3159	1754	162919	93000	164673	98.0933	98.0979	98.9349	98.5146
92003	997	1453	163220	93000	164673	99.0492	99.3929	99.1176	99.2551
89922	3078	1584	163089	93000	164673	98.1907	98.1476	99.0381	98.5909
89968	3032	1759	162914	93000	164673	98.1407	98.1729	98.9318	98.5509
89810	3190	1656	163017	93000	164673	98.1193	98.0807	98.9944	98.5354
91216	1784	1494	163179	93000	164673	98.7278	98.9185	99.0927	99.0056
89922	3078	1584	163089	93000	164673	98.1907	98.1476	99.0381	98.5909
90090	2910	1401	163272	93000	164673	98.3269	98.2489	99.1492	98.697
89995	3005	1705	162968	93000	164673	98.1721	98.1895	98.9646	98.5755
89922	3078	1584	163089	93000	164673	98.1907	98.1476	99.0381	98.5909
92134	866	1628	163045	93000	164673	99.0321	99.4717	99.0114	99.241
89810	3190	1656	163017	93000	164673	98.1193	98.0807	98.9944	98.5354
89922	3078	1584	163089	93000	164673	98.1907	98.1476	99.0381	98.5909
91923	1077	1689	162984	93000	164673	98.9265	99.3435	98.9743	99.1586
89810	3190	1656	163017	93000	164673	98.1193	98.0807	98.9944	98.5354
90974	2026	1531	163142	93000	164673	98.6196	98.7734	99.0703	98.9216
89922	3078	1584	163089	93000	164673	98.1907	98.1476	99.0381	98.5909
89989	3011	1638	163035	93000	164673	98.1958	98.1866	99.0053	98.5943
90898	2102	1741	162932	93000	164673	98.5086	98.7263	98.9428	98.8344
89922	3078	1584	163089	93000	164673	98.1907	98.1476	99.0381	98.5909
89841	3159	1754	162919	93000	164673	98.0933	98.0979	98.9349	98.5146
91285	1715	1617	163056	93000	164673	98.7069	98.9592	99.0181	98.9886
89922	3078	1584	163089	93000	164673	98.1907	98.1476	99.0381	98.5909
90254	2746	1158	163515	93000	164673	98.4849	98.3484	99.2968	98.8203
89841	3159	1754	162919	93000	164673	98.0933	98.0979	98.9349	98.5146
						98.3298	98.3832	99.0157	98.698
